June 2014

# PSYCHIATRIC SERVICES

A Journal of the  
American Psychiatric  
Association

- ◆ IOPs for Treatment of Substance Use Disorders: Assessing the Evidence
- ◆ Proven Effectiveness of Skill-Building Approaches in Serious Mental Illness
- ◆ Crime and Violence in Homeless Populations: Offenders and Victims
- ◆ Outpatient Commitment: Sufficient Evidence or Unanswered Questions?

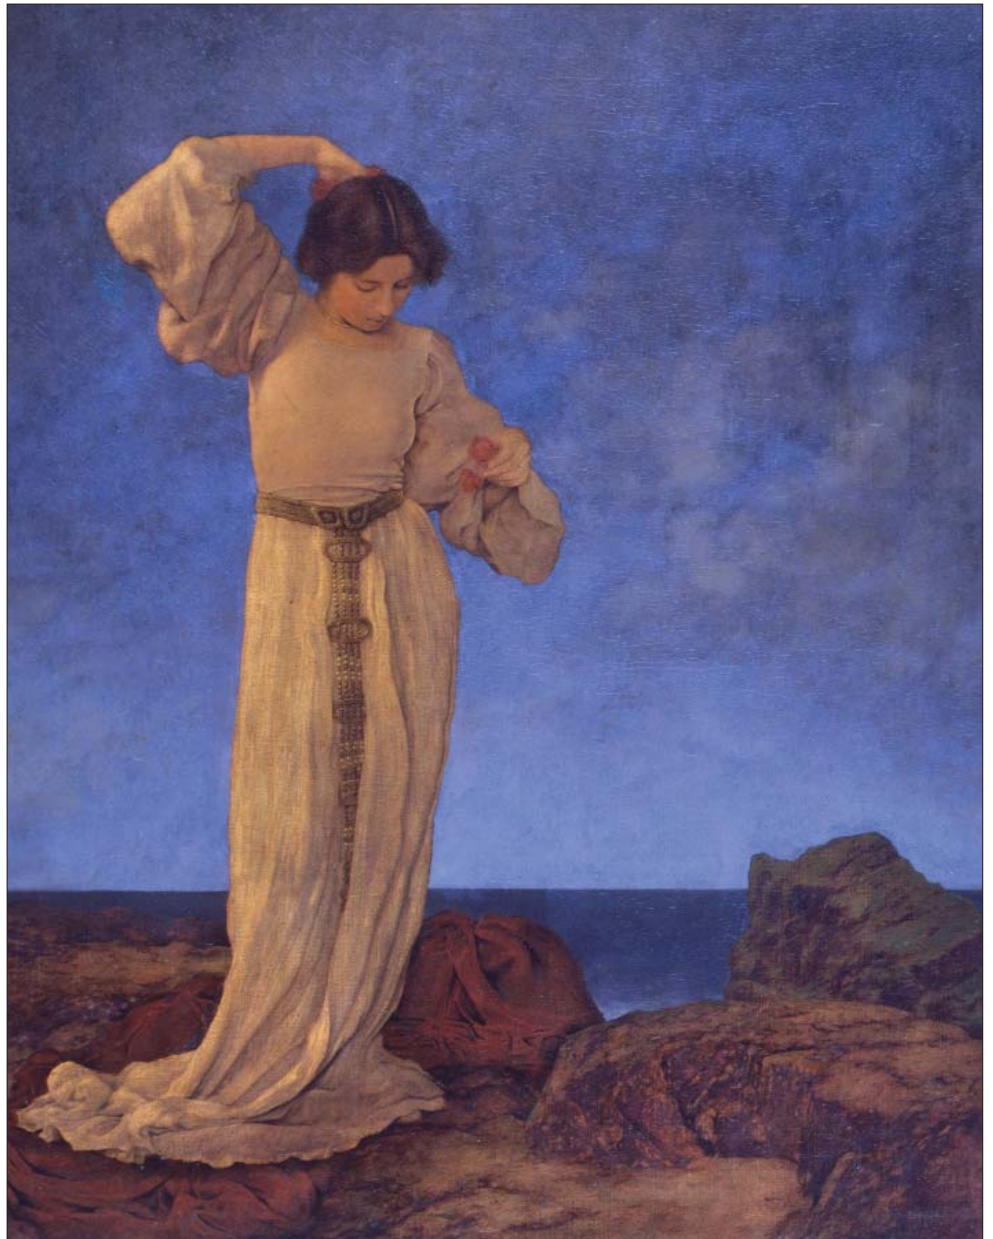

Source: https://ps.psychiatryonline.org/doi/suppl/10.1176/ps.2014.65.issue-6/suppl_file/cover.pdf
